1 **Intraflagellar transport protein 74 is essential for mouse**  
2 **spermatogenesis and male fertility by regulating axonemal**  
3 **microtubule assembly in mice**

4

5 **Lin Shi<sup>1,2,\*</sup>, Ting Zhou<sup>1,\*</sup>, Qian Huang<sup>1,2</sup>, Shiyang Zhang<sup>1,2</sup>, Wei Li<sup>2</sup>, Ling Zhang<sup>1</sup>,**  
6 **Rex A Hess<sup>3</sup>, Gregory J Pazour<sup>4</sup>, Zhibing Zhang<sup>2,5 †</sup>**

7

8

9 <sup>1</sup> School of Public Health, Wuhan University of Science and Technology, Wuhan,  
10 Hubei 430060, China.

11

12 <sup>2</sup> Department of Physiology, Wayne State University, Detroit, MI 48201, United  
13 States.

14

15 <sup>3</sup> Department of Comparative Biosciences, College of Veterinary Medicine,  
16 University of Illinois, 2001 S. Lincoln, Urbana, IL 61802-6199, United States.

17

18 <sup>4</sup> Program in Molecular Medicine, University of Massachusetts Medical School,  
19 Worcester, MA 01605, United States.

20

21 <sup>5</sup> Department of Obstetrics/Gynecology, Wayne State University, Detroit, MI 48201,  
22 United States.

23

24

25 \* These authors contribute equally in this study.

26

27

28 † Author for correspondence: [gn6075@wayne.edu](mailto:gn6075@wayne.edu)

29 **Abstract**

30 IFT74 is a component of the core intraflagellar transport (IFT) complex, a  
31 bidirectional movement of large particles along the axoneme microtubules for cilia  
32 formation. In this study, we investigated its role in sperm flagella formation and  
33 discovered that mice deficiency in IFT74 in male germ cells were infertile associated  
34 with low sperm counts and immotile sperm. The few developed spermatozoa  
35 displayed misshaped heads and short tails. Transmission electron microscopy revealed  
36 abnormal flagellar axoneme in the seminiferous tubules where sperm are made.  
37 Clusters of unassembled microtubules were present in the spermatids. Testicular  
38 expression levels of IFT27, IFT57, IFT81, IFT88 and IFT140 were significantly  
39 reduced in the mutant mice, with the exception of IFT20 and IFT25. The levels of  
40 ODF2 and SPAG16L proteins were also not changed. However, the processed AKAP4  
41 protein, a major component of the fibrous sheath, a unique structure of sperm tail, was  
42 significantly reduced. Our study demonstrates that IFT74 is essential for mouse sperm  
43 formation, probably through assembly of the core axoneme and fibrous sheath, and  
44 highlights a potential genetic factor (IFT74) that contributes to human infertility in  
45 men.

46

## 47 **Introduction**

48 Cilia and flagella are microtubule-based organelles that are found on the surface  
49 of most eukaryotic cells. They have been adapted for a variety of functions such as  
50 cellular motility, directional fluid movement, cellular signaling and sensory reception  
51 (Wheatley, 1995; Bray, 2001; Praetorius and Spring, 2005). The assembly and  
52 maintenance of cilia and flagella depend on intraflagellar transport (IFT), which is a  
53 bidirectional movement of large particles along the microtubule-based axoneme  
54 between the cell body and the distal tip of cilia/flagella (Kozminski et al., 1993;  
55 Kozminski et al., 1995). The IFT machinery is composed of kinesin-2, cytoplasmic  
56 dynein, and protein complexes known as A and B (Cole et al., 1998; Pazour et al.,  
57 1999; Piperno and Mead, 1997). The IFT-A complex consists of six subunits (IFT43,  
58 IFT121/WDR35, IFT122, IFT139/TTC21B, IFT140, and IFT144/WDR19) and other  
59 ancillary proteins, which is powered by dynein 2 to the cilia/flagella tip (Ishikawa and  
60 Marshall, 2011; Taschner et al., 2012). The IFT-B complex contains a salt-stable core  
61 complex of nine subunits (IFT22, IFT25, IFT27, IFT46, IFT52, IFT70, IFT74, IFT81,  
62 and IFT88) and several peripheral components (IFT20, IFT54, IFT57, IFT80, IFT172,  
63 and others), which is driven by kinesin-2 to the cell body (Taschner et al., 2012;  
64 Kozminski et al., 1993; Cole et al., 1998; Pazour et al., 1999; Porter et al., 1999;  
65 Taschner and Lorentzen, 2016). Defects in the assembly and functions of cilia/flagella,  
66 including those in IFT machinery, have been associated with an expanding list of  
67 human diseases, including polycystic kidney, obesity, respiratory defects, retinal  
68 degeneration, brain and skeletal malformation, as well as infertility (Hildebrandt et al.,  
69 2011; Brown and Witman, 2014; Fliegauf et al., 2007).

70

71 Although the identities of most IFT proteins are known, the specific function of  
72 each subunit are poorly understood. As previously reported, the IFT-B complex is  
73 much less stable than IFT-A complex in flagellar isolated from *Chlamydomonas*  
74 (Signor et al., 1999; Lucker et al., 2005). Within the core subset of IFT-B proteins,  
75 IFT25/27, IFT88/52/46, and IFT81/74/72 are considered to interact to form a  
76 heterodimer, a ternary complex, and a heterotetramer in a ratio of 2:1:1, respectively  
77 (Lucker et al., 2005; Wang et al., 2009; Lucker et al., 2010). It should be noted that  
78 the direct interaction of IFT74 and IFT81 through central and C-terminal coiled-coil  
79 domains are sufficient to stabilize IFT-B complex (Taschner et al., 2011; Lucker et al.,

80 2005). Bhogaraju and colleagues found that the N-termini of both proteins form a  
81 tubulin-binding module that enhances the affinity of this interaction. Meanwhile, the  
82 N-terminus of IFT74 interacted with the highly acidic C-terminal tails (called as E-  
83 hooks) of  $\beta$ -tubulin to enhance the binding affinity of *Homo sapiens* IFT81N bound  
84 tubulin by ~18 fold (Bhogaraju et al., 2013). The transport of tubulin to the tip of cilia  
85 is not only crucial for cilium assembly but is also essential for maintenance (Marshall  
86 and Rosenbaum, 2001; Stephens, 1997). It is suggested that IFT74/81, especially  
87 IFT74, plays a critical role in binding and transport of tubulin to the tip of the cilium  
88 and the extent of ciliogenesis. In addition, the region near the N-terminus of IFT74  
89 coiled-coil domain 1 is particularly required for the normal association of IFT-A with  
90 IFT-B in the cell body of flagella and IFT injection frequency (Brown et al., 2015).  
91 Thus, IFT74 combined with IFT81 has an important impact on IFT-B complex  
92 stabilization, tubulin transport, and cilium formation and length.

93

94 It is demonstrated that the mammalian homologue of the IFT74/72 (referred to as  
95 IFT71 in the first report) protein of *Chlamydomonas* is *capillary morphogenesis gene*  
96 (*CMG-1*) (Iomini et al., 2004; Masuda et al., 1997; Bell et al., 2001). Fujino et al  
97 revealed that the mouse *CMG-1* gene was specifically expressed in male germ-line  
98 stem cells but not in embryonic stem cells (Fujino et al., 2006). As previously  
99 reported, *CMG-1* is localized in the primary cilia and centrosomes, but not in the  
100 nucleus of human umbilical vein endothelial cells (HUVEC) (Iomini et al., 2004).  
101 However, Ohbayashi and colleagues have recently identified that *CMG-1* is broadly  
102 distributed in both the cytoplasm and nucleus of GC-2 cells, a mouse pre-meiotic  
103 spermatocyte-derived cell line. Moreover, *CMG-1* is required for cell division and  
104 niche interactions in the early stages of spermatogenesis in the testis (Ichiro  
105 Ohbayashi et al., 2010).

106

107 Even though IFT74 is indispensable for the proliferation of male germ-line stem  
108 cells in the mouse testis, the physiological roles of IFT74 in the process of  
109 spermatogenesis remain largely unknown. Thus, conditional knockout strategy was  
110 utilized to investigate the potential role of IFT74 in sperm flagella formation and male  
111 fertility. With this approach, our laboratory has disrupted mouse *Ift20*, *Ift25* and *Ift27*  
112 genes in male germ cells in mice, and we found that all of them were required for  
113 male fertility, spermiogenesis and sperm flagella formation. The study presented here

114 generated the male germ cell-specific *Ift74* knockout mice by breeding floxed *Ift74*  
115 mice with *Stra8-iCre* mice as previous studies reported. We discovered that the  
116 conditional *Ift74* knockout mice did not show any gross abnormalities, but complete  
117 male infertility with dramatically decreased sperm counts and aberrant structures of  
118 sperm heads and flagella were present. In the conditional *Ift74* knockout mice,  
119 expressions of IFT81 protein, an important IFT74 binding partner, and components of  
120 other IFT complex such as IFT27, IFT57, IFT88 and IFT140 proteins were  
121 significantly reduced. Our findings suggested that IFT74 is essential for normal  
122 mouse spermatogenesis, sperm flagella formation and male fertility in mice.

123

## 124 **Results**

### 125 **Mouse IFT 74 protein expression and localization in mice**

126 IFT74 protein expression was examined in multiple mouse tissues including  
127 heart, brain, spleen, lung, liver, kidney, muscle and testis by Western blot analysis  
128 using a highly sensitive Femto system. While the IFT74 protein was present in the  
129 other organs containing cilia-bearing cells, such as brain, lung, and kidney, it was  
130 highly expressed in the testis (Fig. 1A). The level of IFT74 protein was subsequently  
131 evaluated in mouse testis at different times during the first wave of spermatogenesis.  
132 The IFT74 protein was detectable beginning day 12, which exhibited a significant  
133 increase in abundance from day 20 and after (Fig. 1B).

134

135 In addition, immunofluorescence staining was conducted to investigate where the  
136 IFT74 protein was localized in isolated germ cells from testis in wild-type mice. Non-  
137 specific staining was not observed in cells where no antibody was added (Fig. 2Aa).  
138 In control mice, the specific IFT74 signal was strongly expressed not only in the  
139 vesicles of spermatocytes and round spermatids (Fig. 2Ab, c), but appeared also in the  
140 acrosome and centrosome regions of elongating spermatids (Fig. 2Ad; Fig. 2Bb) and  
141 in developing sperm tails (Fig. 2Ae). The cells were further double stained with an  
142 acrosome marker, the lectin peanut agglutinin, and IFT74 partially co-localized over  
143 the acrosomal region (Fig. 2Ba, b).

144

### 145 **Generation of conditional *Ift74* knockout mice**

146 The expression pattern and localization of IFT74 suggested an essential role for

147 the protein in spermatogenesis; therefore, male germ cell-specific conditional  
148 knockout mice were generated by crossing *Ift74*<sup>lox/lox</sup> females with *Stra8-iCre*  
149 transgenic mice (Fig S1). Testicular IFT74 protein expression in control and  
150 conditional *Ift74* mutant mice was determined by Western blot analysis and  
151 immunofluorescence staining. Western blot results showed that IFT74 protein was  
152 nearly absent in the testes of the homozygous mutant mice, whereas it was robustly  
153 expressed in all control mice (Fig. 3A). However, specific IFT74 signal by  
154 immunofluorescence staining was absent in the knockout mice (not shown).

155

156 **Homozygous conditional *Ift74* KO males were infertile, with significantly**  
157 **reduced sperm counts and motility**

158 All mutant mice survived to adulthood and did not show gross abnormalities. To  
159 evaluate fertility, 2-3 months old controls and homozygous *Ift74* KO males were bred  
160 to 2-3 months old wild-type females for at least two months. All six control males  
161 were fertility and sired normal size litters. However, all six *Ift74* mutant males were  
162 infertile and did not produce any litters during the breeding period (Table 1). To  
163 investigate the mechanisms that underline the infertility, sperm numbers and motility  
164 were examined. Sperm counts were reduced in the conditional *Ift74* knockout mice  
165 (Fig. 3B) and there was a significant reduction in the percentage of motile sperm (Fig.  
166 3C). Sperm motility was also dramatically reduced in the conditional *Ift74* knockout  
167 mice (Fig. 3D, supplemental movies).

168

169 **Table 1. Homozygous *Ift74* knockout males were infertile.**

| Genotype | Fertility | Litter size<br>(n=6) | Testis/body<br>weight (n=6, mg/g) |
|----------|-----------|----------------------|-----------------------------------|
| Control  | 6/6       | 7±2                  | 9.47±0.68                         |
| KO       | 0/6       | 0                    | 8.06±0.40                         |

170 To test fertility, 2-3 months old control and conditional *Ift74* knockout mice were bred  
171 to 2-3 months old wild-type females for at least 2 months. Litter size was recorded for  
172 each mating.

173

174 **Abnormal epididymal sperm in the conditional *Ift74* KO mice**

175 To further identify sperm changes associated with the infertility phenotype,  
176 morphology of cauda epididymal sperm was analyzed by light microscopy (Fig S2)  
177 and SEM (Fig. 4, Fig S3). Sperm from control mice had well-shaped heads and long,  
178 smooth tails. However, only few sperm were recovered sperm from cauda  
179 epididymides from *Ift74* knockout mice and all were abnormal. A variety of  
180 abnormalities were observed in the mutant sperm, including very short tails and  
181 mostly abnormally shaped heads, with only rare sperm having a normal appearing  
182 head.

183

#### 184 **Abnormal spermiogenesis in the conditional *Ift74* KO mice**

185 To analyze changes in spermatogenesis that may contribute to low sperm counts  
186 and abnormal sperm morphology, histology of testes in control and *Ift74* KO mice  
187 were examined (Fig. 5A, Fig S4A). There was no significant difference in testis/body  
188 weights between controls and mutant mice (Table 1). In control mice, testes exhibited  
189 an integrated and normal spermiogenesis (Fig. 5Aa). However, testes of *Ift74* KO  
190 mice showed a failure of spermiation in stage VIII, with abnormal step 16 spermatids  
191 (Ab16) being phagocytized, although in the same tubule step 8 round spermatids and  
192 pachytene spermatocytes (P) appeared normal. Also, normal residual bodies were not  
193 formed. Instead, small pieces of germ cell cytoplasm (Cy) were retained at the  
194 luminal border (Fig. 5Ab) or sloughed into the lumen, as found in the epididymis (Fig.  
195 5Bb). In mutant stage XI, abnormal step 11 spermatids (Ab 11) were observed with  
196 misshaped heads and the absence of sperm tails (Fig. 5Ac). Mutant stage I tubules  
197 showed normal round spermatids, but there were abnormal step 13 elongating  
198 spermatids (Ab13) lacking tails. Excess cytoplasm (Cy) of the elongating spermatids  
199 appeared to be sloughed into the lumen (Fig.5Ad).

200

201 Abnormal spermatogenesis in the *Ift74* knockout mice was also manifested by  
202 the presence of abnormal luminal contents in the cauda epididymis (Fig. 5B, Fig S4B).  
203 In control mice, the lumen that was filled with compacted epididymal sperm that were  
204 aligned with normal heads and tails (Fig. 5B, left; Fig S4B upper). However, in *Ift74*  
205 KO the epididymal lumen contained massive amounts of large abnormal cytoplasmic  
206 bodies, residual bodies, sloughed round cells, and abnormal spermatids with short or  
207 absent tails (Fig. 5B, right; Fig, S4B lower).

208

209 Ultrastructure of seminiferous tubules was determined by TEM in the control  
210 and conditional *Ift74* KO mice (Fig. 6, Fig S5). In control mice, a large number of  
211 axonemes were present in the lumen (Fig. 6a). However, in the seminiferous tubules  
212 of the conditional *Ift74* KO mice, a variety of axonemal abnormalities were  
213 discovered. Spermatid abnormalities included the following: a complete absence of  
214 the axoneme, disorganized microtubules, clusters of microtubules, and abnormally  
215 formed axonemes without the central microtubules. Although the acrosome of  
216 spermatids appeared to be normal, there were some abnormally-shaped heads on  
217 elongating spermatids (Fig. 6b-h; Fig S5).

218

### 219 **IFT74 regulates cellular levels of other IFT proteins and some flagellar proteins**

220 To understand how the loss of IFT74 affects other IFT and flagellar proteins, we  
221 determined the levels of selective IFT and flagellar proteins in the testis of control and  
222 conditional *Ift74* KO mice by Western blot. The protein levels of components of the  
223 IFT-B complex, such as IFT27, IFT57, IFT81, IFT88 and IFT140 were significantly  
224 decreased in *Ift74* KO mice; however, the IFT20 and IFT25 proteins, two additional  
225 components of the IFT-B complex, did not differ from those expressed in control mice  
226 (Fig. 7A). Moreover, IFT74 did not affect testicular expression levels of ODF2, a  
227 major component of the sperm tail outer dense fibers, and an axonemal central  
228 apparatus protein, SPAG16L. However, AKAP4, a processed form of the major  
229 component of the fibrous sheath, was significantly reduced in the knockout mice (Fig.  
230 7B).

231

### 232 **Discussion**

233 In this study, we first characterized the expression pattern of IFT74 in male germ  
234 cells, and then examined the reproductive phenotype of conditional *ift74* knockout  
235 mice. IFT74 was found to be highly expressed during spermiogenesis, suggesting a  
236 specific role in the morphological changes that germ cell undergo during  
237 differentiation, particularly formation of the sperm flagellum. This function is  
238 consistent with the conserved role of IFT in cilia formation and is further supported  
239 by its localization. During spermatogenesis, IFT74 is associated with vesicles in  
240 spermatocytes and round spermatids, with the acrosome and centrosome of elongating  
241 spermatids, and in the developing sperm tails. This is similar to previous studies



242 (Iomini et al., 2001) showing IFT74 localization in the proximal region of developing  
243 flagella and base of the mature flagellum in wild-type cells (Esparza et al., 2013),  
244 which suggests that IF74 may be involved in carrying cargo proteins responsible for  
245 formation of the sperm flagellum. This hypothesis is strongly supported by data  
246 obtained in the conditional *Ift74* knockout mice. The homozygous males were infertile  
247 due to low sperm numbers and significantly reduced sperm motility. Abnormalities in  
248 sperm morphology we also observed, such as round and distorted heads, short tails,  
249 and a great diversity of axonemal and microtubular abnormalities in spermatids from  
250 the *Ift74* KO mice. Given that a major ultrastructural observation was the lack of  
251 microtubule assembly in spermatids, it is likely that one of IFT74's major functions in  
252 testis is the transport of  $\beta$ -tubulin for microtubule assembly during formation of the  
253 axoneme in differentiating spermatids.

254

255 It has been shown that IFT74 is expressed in spermatogonia and, most  
256 abundantly, in premeiotic spermatocytes (Ichiro Ohbayashi et al., 2010). It is essential  
257 for the expression of *cyclin-D2* in the mouse premeiotic spermatocyte-derived GC-2  
258 cell line (Fujino et al., 2006). Furthermore, siRNA-mediated knockdown of *Ift74* in  
259 GC-2 cells resulted in a significant reduction of protein levels of cell-adhesion  
260 molecules such as E-cadherin protein that is required for the initial cell division of  
261 spermatogonial stem cells (Yamashita et al., 2003). These findings from *in vitro*  
262 studies were not consistent with our *in vivo* observations from the conditional *Ift74*  
263 knockout mice. Even though IFT74 protein is first detected on day 12 after birth in  
264 control testes, the knockout mice phenotype was not observed until the  
265 spermiogenesis phase. Thus, our results do not support the idea that IFT74 is essential  
266 for mitosis and meiotic development of male germ cells.

267

268 The function of IFT74 seems to be conserved between *Chlamydomonas*  
269 *reinhardtii* and mouse. In *Chlamydomonas reinhardtii* *Ift74* null mutant cells had no  
270 cilia or only short cilia (Brown et al., 2015). In *Ift74* knockout mice, a consistent  
271 observation was the lack of axoneme formation in seminiferous tubules, and when  
272 occasionally present the sperm had very short tails. Moreover, the accumulation of  
273 disorganized microtubules in mutant spermatid cytoplasm suggests a failure to  
274 incorporate tubulin into the flagellum, which would be consistent with the known

275 function of IFT74 as a tubulin carrier. In *Chlamydomonas*, many *Ift74* mutant flagella  
276 showed no IFT movements and severe defects of IFT injection (Brown et al., 2015;  
277 Wren et al., 2013; Craft et al., 2015). Even though there is limited visibility of IFT  
278 protein in the flagellum, IFT frequency and retrograde velocity are both dramatically  
279 reduced in the mutant compare with wild-type cells, suggesting that IFT74 could be a  
280 master regulator controlling sperm formation by modulating axoneme and  
281 microtubule assembly.

282

283 The concept that IFT74 may serve as a master regulator of axoneme assembly is  
284 supported by Brown and colleagues' study that IFT74 is required to stabilize IFT-B  
285 and flagella assembly (Brown et al., 2015). It has been shown that IFT74 and IFT81  
286 interact directly through not only central and C-terminal coiled-coil domains, but also  
287 the N-termini of both proteins to enhance the IFT-B complex stability (Lucker et al.,  
288 2005; Bhogaraju et al., 2013). Defect in IFT74 function is likely to affect the  
289 interactions of these proteins and the stability of IFT81 formed IFT-B complex. The  
290 levels of both core IFT81 and IFT57 proteins are lower in *Chlamydomonas reinhardtii*  
291 *Ift74* mutants than that in wild-type cells (Brown et al., 2015). This function seems to  
292 be conserved also in mouse. Expression levels of most IFT components examined,  
293 including IFT27, IFT57, IFT81 and IFT88, IFT140 were reduced in the conditional  
294 *Ift74* knockout mice, suggesting that IFT74 is a core IFT component that controls the  
295 stability of other IFTs. These proteins might be gradually degraded when IFT-B  
296 complex is unable to assemble without expression of the *Ift74* gene. This differs from  
297 several other conditional *Ift* knockout mice. In conditional *Ift25*, *Ift27* and *Ift140*  
298 knockout mice, expression levels of most IFT proteins, particularly IFT74, were not  
299 changed (Zhang et al., 2017; Liu et al., 2017). It has been demonstrated that both  
300 peripheral proteins (IFT20 and IFT25) are localized outside of the core IFT-B  
301 subcomplex, and their behaviors are possibly different from other IFT-B proteins  
302 (Wang et al., 2009; Pedersen et al., 2005; Richey and Qin, 2012; Iomini et al., 2009),  
303 which would explain why there was no change in IFT20 and IFT25 expression levels  
304 in the *Ift74* knockout mice. In *Ift25* mutant mice, the IFT20 protein level was  
305 significantly reduced, but IFT74 protein was still present similar to that of wild-type  
306 mice (Liu et al., 2017). It appears that IFT20 and IFT25 form a sub-complex that does  
307 not include IFT74 in male germ cells.

308

309 Testicular ODF2 and SPAG16L protein levels were not changed in the  
310 conditional *Ift74* knockout mice. In *Ift20* KO mice, ODF2 and SPAG16L, two sperm  
311 flagella proteins, fail to be incorporated into sperm tails (Zhang et al., 2016); thus, the  
312 potential role of IFT74 in the localization of these proteins remains to be determined.  
313 Interestingly, expression pattern of a sperm fibrous sheath protein, A-Kinase anchor  
314 protein (AKAP4) was changed in the absence of IFT74. *Akap4* gene is translated as a  
315 full length 110 kDa precursor (pro-AKAP4). The pro-AKAP4 should be transported  
316 from cytoplasm to the fibrous sheath assemble site, presumably by IFT. A 26 kDa  
317 peptide is processed out at the fibrous sheath assemble site, and the 84 kDa AKAP4 is  
318 incorporated into sperm fibrous sheath (Johnson et al., 1997; Turner et al., 1999). In  
319 the wild-type mice testis, the AKAP4 seems to be the predominant form, and the pro-  
320 AKAP4 level is significant less than AKAP4. However, in the *Ift74* knockout mice,  
321 pro-AKAP4 became the predominant form. The reason might be that the pro-AKAP4  
322 is not transported to the fibrous sheath assemble site due to disrupted IFT, and the  
323 precursor is not processed. Much research remains if we are to learn how IFT74  
324 modulates sperm structure.

325

326 In conclusion, we explored the role of IFT74 in mouse sperm development and  
327 male fertility and the findings support that IFT74 is essential for mouse  
328 spermatogenesis and specifically the sperm flagellum via the assembly of  
329 microtubules during formation of the axoneme. By analyzing the expression of other  
330 IFT components and sperm flagella proteins, we have concluded that IFT74 may  
331 function as a core component of the IFT-B complex to modulate its stability and for  
332 transporting the fibrous sheath precursor for sperm fibrous sheath formation.

333

## 334 **Material and Methods**

### 335 **Ethics statement**

336 All animal procedures were approved by Wayne State University Institutional  
337 Animal Care and Use Program Advisory Committee (Protocol number: IACUC-18-  
338 02-0534) in accordance with federal and local regulations regarding the use of non-  
339 primate vertebrates in scientific research.

340

### 341 **Generation of *Ift74* condition knockout mice**

342 The *Ift74*<sup>Tmla</sup> mice were obtained from the KOMP project at Jackson Laboratory  
343 and converted to the *Ift74*<sup>lox</sup> allele by FlpE (Farley et al., 2000). *Stra8-iCre* mice were  
344 purchased from Jackson Laboratory (Stock No:008208). Transgenic mouse line *Stra8-*  
345 *cre* expresses improved Cre recombinase under the control of a 1.4 Kb promoter  
346 region of the germ cell-specific stimulated by retinoic acid gene 8 (*Stra8*) (Sadate-  
347 Ngatchou et al., 2008). To generate the germ cell-specific *Ift74* KO mice, the same  
348 breeding strategy used to generate germ cell-specific *Ift20*, *Ift25* and *Ift27* knockout  
349 mice was used (Zhang et al., 2016; Liu et al., 2017; Zhang et al., 2017). Briefly, three  
350 to four-month old *Stra8-cre* males were crossed with three to four-month old  
351 *Ift74*<sup>lox/lox</sup> females to obtain *Stra8-iCre; Ift74*<sup>lox/+</sup> mice. The three to four-month old  
352 *Stra8-iCre; Ift74*<sup>lox/+</sup> males were crossed back with three to four-month old *Ift74*<sup>lox/lox</sup>  
353 females again, and the *Stra8-iCre; Ift74*<sup>lox/lox</sup> were considered to be the homozygous  
354 knockout mice (KO). *Stra8-iCre; Ift74*<sup>lox/+</sup> mice were used as the controls.

355

356 Mice were genotyped by PCR using multiplex PCR mix (Bioline, Cat No.  
357 BIO25043). To genotype the offspring, genomic DNA was isolated as described  
358 previously (Keady et al., 2012). The presence of the *Stra8-iCre* allele was evaluated  
359 as previous study (Sadate-Ngatchou et al., 2008), and *Ift74* genotypes were  
360 determined as described as previously. The following primers were used for  
361 genotyping: *Stra8-iCre* forward: 5-GTGCAAGCTGAACAA CAGGA-3; *Stra8-iCre*  
362 reverse: 5-AGGGACACAGCATTGGAGTC-3, and *Ift74* wild-type primer 1:5-  
363 CTGAGTGAAAGTGGAGC-3; primer 2 : 5-CAAGAAAGCTTGGGTCTAGAT-3;  
364 KO primer 3: 5-GAATGCATGTGAAATACATTGTGAA-3; primer 4: 5-  
365 GAGAAAAGCAGTAATAGTTCTCATCTCC-3.

366

### 367 **Western blot analysis**

368 All tissue samples from three to four-months old mice were homogenized on ice  
369 in lysis buffer [(50 mM Tris-HCl pH 8.0, 170 mM NaCl, 1% NP40, 5 mM EDTA, 1  
370 mM DTT and protease inhibitors (Complete mini; Roche diagnostics GmbH)] using  
371 Ultra Turrax. Supernatants were collected after being centrifuged at 13000 rpm, for 10  
372 min at 4°C. Protein concentrations were measured using Bio-Rad DCTM protein  
373 assay kit (Bio-Rad) by Lowry assay. Proteins were denatured under 95°C for 10 min,  
374 then separated by SDS-PAGE and transferred to polyvinylidene fluoride membranes

375 (Millipore, Billerica, MA, USA). Then the Nonspecific sites were blocked in a Tris-  
376 buffered saline solution containing 5% nonfat dry milk powder and 0.05% Tween 20  
377 (TBST) for 1 hour at room temperature, and the membranes were incubated with  
378 indicated primary antibodies (IFT25: 1:2000, Cat No: 15732-1-AP, ProteinTech;  
379 IFT74: 1:2000, Cat No: AAS27620e from ANTIBODY VERIFY; IFT81: 1:1000, Cat  
380 No: 11744-1-AP, ProteinTech;  $\beta$ -actin: 1:2000, Cat No: 4967 S, Cell Signaling  
381 Antibodies against IFT20, IFT27, IFT57, IFT88 and IFT140 (1:2000) were from Dr.  
382 Pazour's laboratory (Keady et al., 2012, Pazour et al., 2002, Jonassen et al., 2012);  
383 AKAP4: 1:4000, from Dr. George Gerton at University of Pennsylvania; ODF2:  
384 1:800, Cat No: 12058-1-AP, ProteinTech; SPAG16L: 1:1000, generated by Z.Z.'s  
385 laboratory) at 4°C overnight. After washing three times with TBST, the membranes  
386 were incubated with the secondary antibody conjugated with horseradish peroxidase  
387 with a dilution of 1:2000 at room temperature for at least 1 h. After washing with  
388 TBST twice and a final washing with TBS, the bound antibodies were detected with  
389 Super Signal Chemiluminescent Substrate (Pierce, Rockford, IL, USA).

390

### 391 **Assessment of fertility and fecundity**

392 To test fertility and fecundity, 6-week-old or 3-4 months old conditional Ift74  
393 KO and control males were paired with adult wild-type females (3-4 months old).  
394 Mating cages typically consisted of one male and one female. Mating behavior was  
395 observed, and the females were checked for the presence of vaginal plugs and  
396 pregnancy. Once pregnancy was detected, the females were put into separate cages.  
397 Breeding tests for each pair lasted for at least three months. The number of pregnant  
398 mice and the number of offspring from each pregnancy were recorded.

399

### 400 **Spermatozoa counting**

401 Sperm cells were collected and relocated in warm PBS from cauda epididymides  
402 and fixed with 2% formaldehyde for 10 min at room temperature. Followed by  
403 washing with PBS, sperm were suspended into PBS again and counted using a  
404 hemocytometer chamber under a light microscope, and sperm number was calculated  
405 by standard methods as we used previously (Zhang et al., 2006).

406

### 407 **Spermatozoa motility assay**

408 Sperm were collected from the cauda epididymides in warm PBS. Sperm

409 motility was evaluated using an inverted microscope (Nikon, Tokyo, Japan) on a pre-  
410 warmed slide with a SANYO (Osaka, Japan) color charge-coupled device, high-  
411 resolution camera (VCC-3972) and Pinnacle Studio HD (version 14.0) software.  
412 Movies were taken at 15 frames/sec. For each sperm sample, ten fields were selected  
413 for analysis. Individual spermatozoa were tracked using NIH Image J (National  
414 Institutes of Health, Bethesda, MD) and the plug-in MTrackJ. Sperm motility was  
415 calculated as curvilinear velocity (VCL), which is equivalent to the curvilinear  
416 distance (DCL) traveled by each individual spermatozoon in one second ( $VCL =$   
417  $DCL/t$ ).

418

### 419 **Histology on tissue sections**

420 Adult mice testes and epididymides were fixed in 4% formaldehyde solution in  
421 Phosphate-buffered saline (PBS), paraffin embedded, and sectioned into 5  $\mu$ m slides.  
422 Haematoxylin and eosin staining was conducted using standard procedure. Histology  
423 was examined using a BX51 Olympus microscope (Olympus Corp., Melville, NY,  
424 Center Valley, PA), and photographs were taken with the ProgRes C14 camera  
425 (Jenoptik Laser, Germany).

426

### 427 **Isolation of spermatogenic cells and immunofluorescence analysis**

428 Testis from adult mice were dissected in a 15 mL centrifuge tube with 5 mL  
429 DMEM containing 0.5 mg/mL collagenase IV and 1.0  $\mu$ g/mL DNase I (Sigma-  
430 Aldrich) for 30 min at 32°C and shaken gently. Then released spermatogenic cells  
431 were washed one time with PBS after centrifuging for 5 min at 1000 rpm and 4°C,  
432 and the supernatant was discarded. Afterwards, the cells were fixed with 5 mL of 4%  
433 paraformaldehyde (PFA) containing 0.1 M sucrose and shaken gently for 15 min at  
434 room temperature. After washing three times with PBS, the cell pellet was re-  
435 suspended with 2 mL PBS, loaded onto positively charged slides, and stored in a wet  
436 box after the sample on slides air-dried. The spermatogenic cells were permeabilized  
437 with 0.1% Triton X-100 (Sigma-Aldrich) for 5 min at 37 °C, washed with PBS three  
438 times and blocked with 10% goat serum for 30 min at 37°C. Then cells were washed  
439 with PBS three times and incubated overnight with an anti-IFT74 antibody (1:200).  
440 The primary antibodies used were the same as those used for Western blot analysis,  
441 but the dilutions were 10 times higher. Following the secondary antibody incubation,  
442 the slides were washed with PBS three times, mounted using VectaMount with 4', 6-

443 diamidino-2-phenylindole (DAPI)(Vector Laboratories, Burlingame, CA), and sealed  
444 with nail polish. Images were captured by confocal laser-scanning microscopy (Zeiss  
445 LSM 700).

446

#### 447 **Transmission electron microscopy (TEM)**

448 Testis and epididymal sperm from adult mice were fixed in 3% glutaraldehyde/ 1%  
449 paraformaldehyde/0.1 M sodium cacodylate, pH 7.4 at 4°C overnight and processed  
450 for electron microscopy as reported (Zhang et al., 2017). Images were taken with a  
451 Jeol JEM-1230 transmission electron microscope.

452

#### 453 **Scanning electron microscopy (SEM)**

454 For SEM analysis, Mouse epididymal sperm were collected and fixed in the  
455 same fixative solution as transmission electron microscopy (TEM). The samples were  
456 processed by standard methods (Zhang et al., 2006) and images were taken with a  
457 Zeiss EVO 50 XVP SEM at Microscopy Facility, Department of Anatomy and  
458 Neurobiology, Virginia Commonwealth University.

459

#### 460 **Statistical analysis**

461 Analysis of variance (ANOVA) test was used to determine statistical difference;  
462 the 2-tailed student's t-test was used for the comparison of frequencies. Significance  
463 was defined as  $P < 0.05$ .

464

#### 465 **Declaration of interest**

466 There is no conflict of interest that could be perceived as prejudicing the  
467 impartiality of the research reported.

468

#### 469 **Funding**

470 This research was supported by NIH grant HD076257, HD090306 and Start up  
471 fund of Wayne State University (to ZZ), GM060992 (to GJP), National Natural  
472 Science Foundation of China (81671514, 81571428, 81502792, 81300536, and  
473 81172462), Excellent Youth Foundation (2018CFA040) and Youth Foundation  
474 (2018CFB114) of Hubei Science and Technology Office, and Special Fund of Wuhan  
475 University of Science and Technology for Master Student's short-term studying

476 abroad.

477

## 478 **References**

- 479 BELL, S. E., MAVILA, A., SALAZAR, R., BAYLESS, K. J., KANAGALA, S., MAXWELL, S. A. & DAVIS, G. E.  
480 2001. Differential gene expression during capillary morphogenesis in 3D collagen  
481 matrices: regulated expression of genes involved in basement membrane matrix  
482 assembly, cell cycle progression, cellular differentiation and G-protein signaling. *J Cell Sci*,  
483 114, 2755-73.
- 484 BHOGARAJU, S., CAJANEK, L., FORT, C., BLISNICK, T., WEBER, K., TASCHNER, M., MIZUNO, N.,  
485 LAMLA, S., BASTIN, P., NIGG, E. A. & LORENTZEN, E. 2013. Molecular basis of tubulin  
486 transport within the cilium by IFT74 and IFT81. *Science*, 341, 1009-12.
- 487 BRAY, D. 2001. *Cell Movements: From Molecules to Motility*, 3-16, 225-241, Garland Publishing,  
488 New York, NY.
- 489 BROWN, J. M., COCHRAN, D. A., CRAIGE, B., KUBO, T. & WITMAN, G. B. 2015. Assembly of IFT trains  
490 at the ciliary base depends on IFT74. *Curr Biol*, 25, 1583-93.
- 491 BROWN, J. M. & WITMAN, G. B. 2014. Cilia and Diseases. *Bioscience*, 64, 1126-1137.
- 492 COLE, D. G., DIENER, D. R., HIMELBLAU, A. L., BEECH, P. L., FUSTER, J. C. & ROSENBAUM, J. L. 1998.  
493 Chlamydomonas kinesin-II-dependent intraflagellar transport (IFT): IFT particles  
494 contain proteins required for ciliary assembly in *Caenorhabditis elegans* sensory  
495 neurons. *J Cell Biol*, 141, 993-1008.
- 496 CRAFT, J. M., HARRIS, J. A., HYMAN, S., KNER, P. & LECHTRECK, K. F. 2015. Tubulin transport by  
497 IFT is upregulated during ciliary growth by a cilium-autonomous mechanism. *J Cell Biol*,  
498 208, 223-37.
- 499 ESPARZA, J. M., O'TOOLE, E., LI, L., GIDDINGS, T. H., JR., KOZAK, B., ALBEE, A. J. & DUTCHER, S. K.  
500 2013. Katanin localization requires triplet microtubules in *Chlamydomonas reinhardtii*.  
501 *PLoS One*, 8, e53940.
- 502 FARLEY, F. W., SORIANO, P., STEFFEN, L. S. & DYMECKI, S. M. 2000. Widespread recombinase  
503 expression using FLP<sub>er</sub> (flipper) mice. *Genesis*, 28, 106-10.
- 504 FLIEGAUF, M., BENZING, T. & OMRAN, H. 2007. When cilia go bad: cilia defects and ciliopathies.  
505 *Nat Rev Mol Cell Biol*, 8, 880-93.
- 506 FUJINO, R. S., ISHIKAWA, Y., TANAKA, K., KANATSU-SHINOHARA, M., TAMURA, K., KOGO, H.,  
507 SHINOHARA, T. & HARA, T. 2006. Capillary morphogenesis gene (CMG)-1 is among the  
508 genes differentially expressed in mouse male germ line stem cells and embryonic stem  
509 cells. *Mol Reprod Dev*, 73, 955-66.
- 510 HILDEBRANDT, F., BENZING, T. & KATSANIS, N. 2011. Ciliopathies. *N Engl J Med*, 364, 1533-43.
- 511 ICHIRO OHBAYASHI, K., TANAKA, K., KITAJIMA, K., TAMURA, K. & HARA, T. 2010. Novel role for the  
512 intraflagellar transport protein CMG-1 in regulating the transcription of cyclin-D2, E-  
513 cadherin and integrin-alpha family genes in mouse spermatocyte-derived cells. *Genes*  
514 *Cells*, 15, 699-710.
- 515 IOMINI, C., BABAIEV-KHAIMOV, V., SASSAROLI, M. & PIPERNO, G. 2001. Protein particles in  
516 *Chlamydomonas* flagella undergo a transport cycle consisting of four phases. *J Cell Biol*,  
517 153, 13-24.
- 518 IOMINI, C., LI, L., ESPARZA, J. M. & DUTCHER, S. K. 2009. Retrograde intraflagellar transport



- 519 mutants identify complex A proteins with multiple genetic interactions in  
520 *Chlamydomonas reinhardtii*. *Genetics*, 183, 885-96.
- 521 IOMINI, C., TEJADA, K., MO, W., VAANANEN, H. & PIPERNO, G. 2004. Primary cilia of human  
522 endothelial cells disassemble under laminar shear stress. *J Cell Biol*, 164, 811-7.
- 523 ISHIKAWA, H. & MARSHALL, W. F. 2011. Ciliogenesis: building the cell's antenna. *Nat Rev Mol Cell*  
524 *Biol*, 12, 222-34.
- 525 JOHNSON, L. R., FOSTER, J. A., HAIG-LADEWIG, L., VANSCOY, H., RUBIN, C. S., MOSS, S. B. &  
526 GERTON, G. L. 1997. Assembly of AKAP82, a protein kinase A anchor protein, into the  
527 fibrous sheath of mouse sperm. *Dev Biol*, 192, 340-50.
- 528 JONASSEN, J. A., SANAGUSTIN, J., BAKER, S. P. & PAZOUR, G. J. 2012. Disruption of IFT complex A  
529 causes cystic kidneys without mitotic spindle misorientation. *J Am Soc Nephrol*, 23, 641-  
530 51.
- 531 KEADY, B. T., SAMTANI, R., TOBITA, K., TSUCHYA, M., SAN AGUSTIN, J. T., FOLLIT, J. A., JONASSEN, J.  
532 A., SUBRAMANIAN, R., LO, C. W. & PAZOUR, G. J. 2012. IFT25 links the signal-dependent  
533 movement of Hedgehog components to intraflagellar transport. *Dev Cell*, 22, 940-51.
- 534 KOZMINSKI, K. G., BEECH, P. L. & ROSENBAUM, J. L. 1995. The *Chlamydomonas* kinesin-like  
535 protein FLA10 is involved in motility associated with the flagellar membrane. *J Cell Biol*,  
536 131, 1517-27.
- 537 KOZMINSKI, K. G., JOHNSON, K. A., FORSCHER, P. & ROSENBAUM, J. L. 1993. A motility in the  
538 eukaryotic flagellum unrelated to flagellar beating. *Proc Natl Acad Sci U S A*, 90, 5519-23.
- 539 LIU, H., LI, W., ZHANG, Y., ZHANG, Z., SHANG, X., ZHANG, L., ZHANG, S., LI, Y., SOMOZA, A. V., DELPI,  
540 B., GERTON, G. L., FOSTER, J. A., HESS, R. A., PAZOUR, G. J. & ZHANG, Z. 2017. IFT25, an  
541 intraflagellar transporter protein dispensable for ciliogenesis in somatic cells, is essential  
542 for sperm flagella formation. *Biol Reprod*, 96, 993-1006.
- 543 LUCKER, B. F., BEHAL, R. H., QIN, H., SIRON, L. C., TAGGART, W. D., ROSENBAUM, J. L. & COLE, D. G.  
544 2005. Characterization of the intraflagellar transport complex B core: direct interaction  
545 of the IFT81 and IFT74/72 subunits. *J Biol Chem*, 280, 27688-96.
- 546 LUCKER, B. F., MILLER, M. S., DZIEDZIC, S. A., BLACKMARR, P. T. & COLE, D. G. 2010. Direct  
547 interactions of intraflagellar transport complex B proteins IFT88, IFT52, and IFT46. *J Biol*  
548 *Chem*, 285, 21508-18.
- 549 MARSHALL, W. F. & ROSENBAUM, J. L. 2001. Intraflagellar transport balances continuous  
550 turnover of outer doublet microtubules: implications for flagellar length control. *J Cell*  
551 *Biol*, 155, 405-14.
- 552 MASUDA, M., KOBAYASHI, K., HORIUCHI, M., TERAZONO, H., YOSHIMURA, N. & SAHEKI, T. 1997. A  
553 novel gene suppressed in the ventricle of carnitine-deficient juvenile visceral steatosis  
554 mice. *FEBS Lett*, 408, 221-4.
- 555 PAZOUR, G. J., BAKER, S. A., DEANE, J. A., COLE, D. G., DICKERT, B. L., ROSENBAUM, J. L., WITMAN,  
556 G. B. & BESHARSE, J. C. 2002. The intraflagellar transport protein, IFT88, is essential for  
557 vertebrate photoreceptor assembly and maintenance. *J Cell Biol*, 157, 103-13.
- 558 PAZOUR, G. J., DICKERT, B. L. & WITMAN, G. B. 1999. The DHC1b (DHC2) isoform of cytoplasmic  
559 dynein is required for flagellar assembly. *J Cell Biol*, 144, 473-481.
- 560 PEDERSEN, L. B., MILLER, M. S., GEIMER, S., LEITCH, J. M., ROSENBAUM, J. L. & COLE, D. G. 2005.  
561 *Chlamydomonas* IFT172 is encoded by FLA11, interacts with CrEB1, and regulates IFT at  
562 the flagellar tip. *Curr Biol*, 15, 262-6.

- 563 PIPERNO, G. & MEAD, K. 1997. Transport of a novel complex in the cytoplasmic matrix of  
564 Chlamydomonas flagella. *Proc Natl Acad Sci U S A*, 94, 4457-62.
- 565 PORTER, M. E., BOWER, R., KNOTT, J. A., BYRD, P. & DENTLER, W. 1999. Cytoplasmic dynein heavy  
566 chain 1b is required for flagellar assembly in Chlamydomonas. *Mol Biol Cell*, 10, 693-712.
- 567 PRAETORIUS, H. A. & SPRING, K. R. 2005. A physiological view of the primary cilium. *Annu Rev*  
568 *Physiol*, 67, 515-29.
- 569 RICHEY, E. A. & QIN, H. 2012. Dissecting the sequential assembly and localization of intraflagellar  
570 transport particle complex B in Chlamydomonas. *PLoS One*, 7, e43118.
- 571 SADATE-NGATCHOU, P. I., PAYNE, C. J., DEARTH, A. T. & BRAUN, R. E. 2008. Cre recombinase  
572 activity specific to postnatal, premeiotic male germ cells in transgenic mice. *Genesis*, 46,  
573 738-42.
- 574 SIGNOR, D., WEDAMAN, K. P., ROSE, L. S. & SCHOLEY, J. M. 1999. Two heteromeric kinesin  
575 complexes in chemosensory neurons and sensory cilia of Caenorhabditis elegans. *Mol*  
576 *Biol Cell*, 10, 345-60.
- 577 STEPHENS, R. E. 1997. Synthesis and turnover of embryonic sea urchin ciliary proteins during  
578 selective inhibition of tubulin synthesis and assembly. *Mol Biol Cell*, 8, 2187-98.
- 579 TASCHNER, M., BHOGARAJU, S. & LORENTZEN, E. 2012. Architecture and function of IFT complex  
580 proteins in ciliogenesis. *Differentiation*, 83, S12-22.
- 581 TASCHNER, M., BHOGARAJU, S., VETTER, M., MORAWETZ, M. & LORENTZEN, E. 2011. Biochemical  
582 mapping of interactions within the intraflagellar transport (IFT) B core complex: IFT52  
583 binds directly to four other IFT-B subunits. *J Biol Chem*, 286, 26344-52.
- 584 TASCHNER, M. & LORENTZEN, E. 2016. The Intraflagellar Transport Machinery. *Cold Spring Harb*  
585 *Perspect Biol*, 8.
- 586 TURNER, R. M., ERIKSSON, R. L., GERTON, G. L. & MOSS, S. B. 1999. Relationship between sperm  
587 motility and the processing and tyrosine phosphorylation of two human sperm fibrous  
588 sheath proteins, pro-hAKAP82 and hAKAP82. *Mol Hum Reprod*, 5, 816-24.
- 589 WANG, Z., FAN, Z. C., WILLIAMSON, S. M. & QIN, H. 2009. Intraflagellar transport (IFT) protein  
590 IFT25 is a phosphoprotein component of IFT complex B and physically interacts with  
591 IFT27 in Chlamydomonas. *PLoS One*, 4, e5384.
- 592 WHEATLEY, D. N. 1995. Primary cilia in normal and pathological tissues. *Pathobiology*, 63, 222-38.
- 593 WREN, K. N., CRAFT, J. M., TRITSCHLER, D., SCHAUER, A., PATEL, D. K., SMITH, E. F., PORTER, M. E.,  
594 KNER, P. & LECHTRECK, K. F. 2013. A differential cargo-loading model of ciliary length  
595 regulation by IFT. *Curr Biol*, 23, 2463-71.
- 596 YAMASHITA, Y. M., JONES, D. L. & FULLER, M. T. 2003. Orientation of asymmetric stem cell division  
597 by the APC tumor suppressor and centrosome. *Science*, 301, 1547-50.
- 598 ZHANG, Y., LIU, H., LI, W., ZHANG, Z., SHANG, X., ZHANG, D., LI, Y., ZHANG, S., LIU, J., HESS, R. A.,  
599 PAZOUR, G. J. & ZHANG, Z. 2017. Intraflagellar transporter protein (IFT27), an IFT25  
600 binding partner, is essential for male fertility and spermiogenesis in mice. *Dev Biol*, 432,  
601 125-139.
- 602 ZHANG, Z., KOSTETSKII, I., TANG, W., HAIG-LADEWIG, L., SAPIRO, R., WEI, Z., PATEL, A. M.,  
603 BENNETT, J., GERTON, G. L., MOSS, S. B., RADICE, G. L. & STRAUSS, J. F., 3RD 2006.  
604 Deficiency of SPAG16L causes male infertility associated with impaired sperm motility.  
605 *Biol Reprod*, 74, 751-9.
- 606 ZHANG, Z., LI, W., ZHANG, Y., ZHANG, L., TEVES, M. E., LIU, H., STRAUSS, J. F., 3RD, PAZOUR, G. J.,

607 FOSTER, J. A., HESS, R. A. & ZHANG, Z. 2016. Intraflagellar transport protein IFT20 is  
608 essential for male fertility and spermiogenesis in mice. *Mol Biol Cell*.

609

610

## 611 **Supporting information**

612 **Fig S1. Representative PCR results showing mice with different genotypes.** Upper  
613 panel: primer set to analyze *Ift74* genotyping; lower panel: primer set to detect *Cre*.

614 **Movies S1. Examples of sperm motility patterns from the control mice and the**  
615 **conditional *Ift74* mutant.** The movies are short segments of freshly isolated, non-  
616 capacitated sperm from a control (A) and the conditional *Ift74* mutant mice (B). All  
617 segments were recorded with a DAGE-MTI DC-330 3CCD camera and a Canon  
618 Optura 40 digital camcorder. Segments were assembled into the video using iMovie  
619 HD on a Dual 1GHz 414 PowerPC Processor G4 Apple Macintosh computer. Movie  
620 A. A representative movie from a control mouse. Note that most sperm are motile and  
621 display vigorous flagellar activity and progressive, long-track forward movement.  
622 Movie B. A representative movie from a conditional *Ift74* mutant mouse. Notice that  
623 there are fewer sperm compared to the control mice, with the same dilution, and all  
624 sperm are immotile. A large number of degenerated cells are also present.

625 **Fig S2. Morphological Examination of epididymal sperm in the control and**  
626 **conditional *Ift74* knockout mice by light microscopy.** Sperm from the control mice  
627 (a) showed normal appearance. Few sperm were recovered from the conditional *Ift74*  
628 knockout mice (b to d), and none of the sperm discovered showed normal morphology.

629 **Fig S3. Additional SEM images of epididymal sperm from the conditional *Ift74***  
630 **knockout mice.** Images in “a” and “b” show two sperm with short tails and abnormal  
631 heads.

632 **Fig S4. Low magnification images of histology of testis and epididymis of adult**  
633 **control and conditional *Ift74* mutant mice.** A. Testis sections. Notice that  
634 seminiferous tubules in the control mice (upper) contain normally developed germ  
635 cells, and sperm were found in the lumen (arrow). In the mutant mice (lower), the  
636 seminiferous tubules were almost empty in the lumen. B. Epididymal sections. The  
637 epididymal lumens of a control mouse (upper) are filled with well-developed sperm.  
638 In *Ift74* mutant (lower), the cauda epididymal lumen contains sloughed spermatids,  
639 numerous detached sperm heads and abnormal tails and other cellular debris.

640 **Fig S5. Additional ultrastructural changes in the testis of conditional *Ift74***

641 **knockout mice.** a. The lumen of seminiferous tubule had degenerated cells and  
642 axoneme structure were hardly seen; b: misorganized microtubules (arrows) in the  
643 cytoplasm of an abnormally developed spermatid; c, d: abnormally condensed  
644 chromatin (arrowse: abnormally condensed chromatin (arrow), mis-organized  
645 mitochondria (dashed arrows); f, g: misorganized mictotubules (arrows); h: an  
646 abnormally localized axoneme (arrow), representing an abnormal spermatid that is  
647 being phagocyted by a Sertoli cell.

648

## 649 **Figure legend**

650 **Fig 1. Mouse IFT74 protein is highly expressed in the testis and developmentally**  
651 **regulated during spermatogenesis.** A. Western blot analysis of mouse IFT74 protein,  
652 using a high sensitive Femto system. Notice that IFT74 is highly expressed in the  
653 testis and is also present in the tissues bearing motile and primary cilia, including  
654 brain, lung and kidney. B. IFT74 expression during the first wave of spermatogenesis.  
655 A representative Western blot result shows that its expression is significantly  
656 increased at day 20 after birth.

657 **Fig 2. Localization of IFT74 in male germ cells.** A. Immunofluorescence staining of  
658 IFT74 in germ cells of wild type mice. The top row show the germ cells with phase  
659 contrast microscopy. No specific signal was detected in the negative control using  
660 preimmune serum (a). It is present as vesicles in spermatocytes (arrow and insert in b)  
661 and round spermatids (dashed arrow and insert in (c). It appears to be present in the  
662 acrosome and centrosome of elongating spermatid (d), and developing tail (white  
663 arrowhead in e); B. The cells were double stained with a lectin acrosome marker,  
664 peanut agglutinin. IFT74 was co-localized with lectin. In addition, it was also present  
665 as a dot at the opposite region of the acrosome (white arrow), presumably the  
666 centriole.

667 **Fig 3. Significant reduction in sperm numbers and motility in the conditional**  
668 ***Ift74* knockout mice.** A. Western blot analysis of testicular IFT74 protein expression  
669 in control and conditional *Ift74* knockout mice. Notice that IFT74 protein was missing  
670 in the knockout mice. Epididymal sperm were collected and physiologic parameters  
671 were compared between the control and *Ift74* knockout mice. In *Ift74* knockout mice,  
672 there was a significant reduction (\*  $p < 0.05$ ) in sperm counts (B), percentage of  
673 motile sperm (C), and sperm motility (D).

674 **Fig 4. Abnormal epididymal sperm in the conditional *Ift74* knockout mice.**

675 Examination of epididymal sperm by SEM. a: Representative image of epididymis  
676 sperm with normal morphology from a control mouse. The sperm has a normally  
677 shaped head and a long, smooth tail; “b” to “d”: Representative images of epididymal  
678 sperm from a conditional *Ift74* knockout mice. All sperm have short tails and most  
679 have grossly abnormal heads. “c” to “f” show sperm with both abnormal heads and a  
680 short abnormal tails.

681 **Fig 5. Abnormal spermiogenesis in the conditional *Ift74* knockout mice.** A. Testis

682 histology from control and *Ift74* KO mice showing cross sections of seminiferous  
683 tubules. Bar = 20µm. a) Control seminiferous tubule Stage VIII-IX, showing steps 8  
684 and 9 round spermatids, flagella (F) of sperm being released into the lumen and  
685 residual bodies (Rb) of germ cell cytoplasm being phagocytized by Sertoli cells. P,  
686 pachytene spermatocyte. b) *Ift74* KO seminiferous tubule in Stage VIII, showing  
687 normal step 8 round spermatids and pachytene spermatocytes (P). Abnormal step 16  
688 spermatids (Ab16) are seen being phagocytized and failing to spermiation. Residual  
689 bodies are not forming but small pieces of germ cell cytoplasm (Cy) are retained at  
690 the luminal border. c) *Ift74* KO Stage XI with abnormal step 11 spermatids (Ab11)  
691 with abnormally shaped heads and absence of tails. P, pachytene spermatocyte. d)  
692 *Ift74* KO tubule showing normal round spermatids but abnormal step 13 elongating  
693 spermatids (Ab13) that are lacking tails. Excess cytoplasm (Cy) of the elongating  
694 spermatids appears to be sloughed into the lumen. B. Cauda epididymis from control  
695 and *Ift74* KO mice. Bar = 20 µm. a) Control epididymis showing an epithelium (Ep)  
696 lining the lumen that is filled with normal sperm aligned with their heads (Hd) and  
697 tails (T). b) *Ift74* KO epididymis showing a lumen filled with numerous, large  
698 cytoplasmic bodies that are likely residual bodies (Rb) and sperm with abnormal  
699 heads (Ab) and short or absent tails. Gc, sloughed round spermatid.

700 **Fig 6. Ultrastructural changes in the testis of conditional *Ift74* knockout mice.**

701 Testicular ultrastructural was analyzed in the conditional *Ift74* knockout mice. “a”  
702 Control mouse TEM image. Numerous axonemes of sperm tails are seen in the lumen.  
703 “b-h” *Ift74* mutant mouse testis. “b” shows the lumen area with the absence of normal  
704 axonemal structures. The arrow in “c” points to disorganized microtubules; the insert  
705 in “d” shows clusters of microtubules (arrows) and mitochondria (dashed arrows)  
706 without a core axoneme structure; the insert in “e” shows an abnormally formed

707 axoneme without the central microtubules; the insert in “f” shows an abnormally  
708 formed elongating spermatid; “g” shows sloughed residual bodies and abnormal  
709 spermatids; the insert in “g” shows an abnormal spermatid. The developing acrosome  
710 appears to be normal (h).

711 **Fig 7. IFT74 regulates expression levels of some IFT and flagellar proteins. A.**  
712 Examination of selective IFT protein expression levels in the control and conditional  
713 *Ift74* knockout mice by Western blot. Compared to the controls, the expression levels  
714 of IFT27, IFT57, IFT81, IFT88 and IFT140, but not IFT20 and IFT25 are reduced in  
715 the conditional *Ift74* knockout mice. a: representative Western blot result; b:  
716 quantitative analysis of selective IFT protein expression. B. Examination of testicular  
717 expression levels of ODF2, a component of sperm tail outer dense fibers, AKAP4, a  
718 major component of fibrous sheath, and SPAG16L, a component of axonemal central  
719 apparatus protein in the control and conditional *Ift74* knockout mice. There was no  
720 difference in ODF2 and SPAG16L expression. However, the processed AKAP4 was  
721 significantly reduced in the conditional *Ift74* knockout mice.  $\beta$ -ACTIN was used as  
722 controls. a: representative Western blot result; b: quantitative analysis of ODF2 and  
723 SPAG16L; c: quantitative analysis of AKAP4.

Figure 1

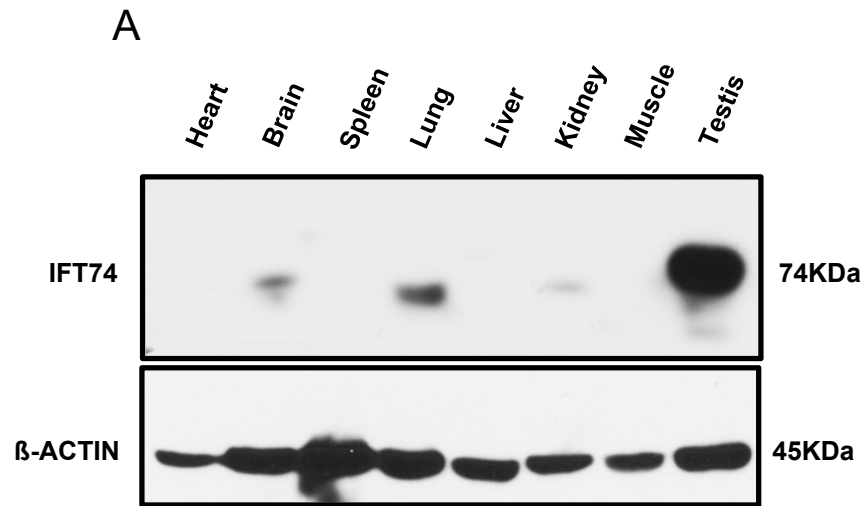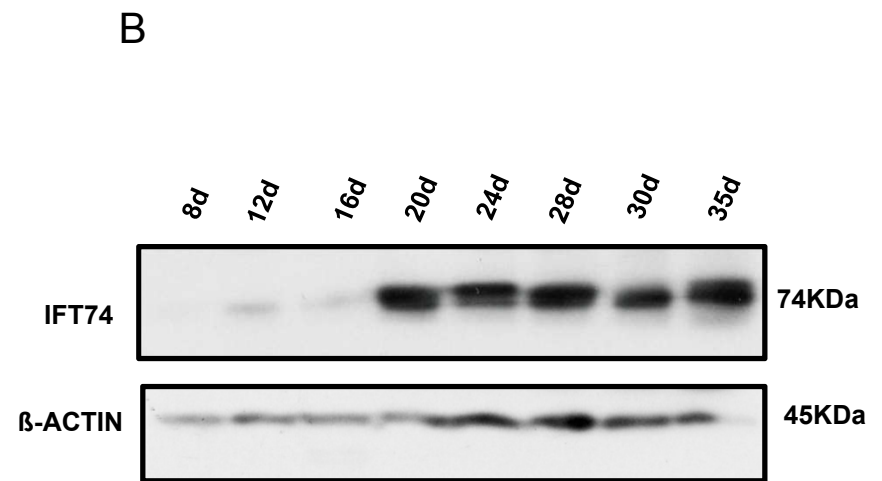

Figure 2

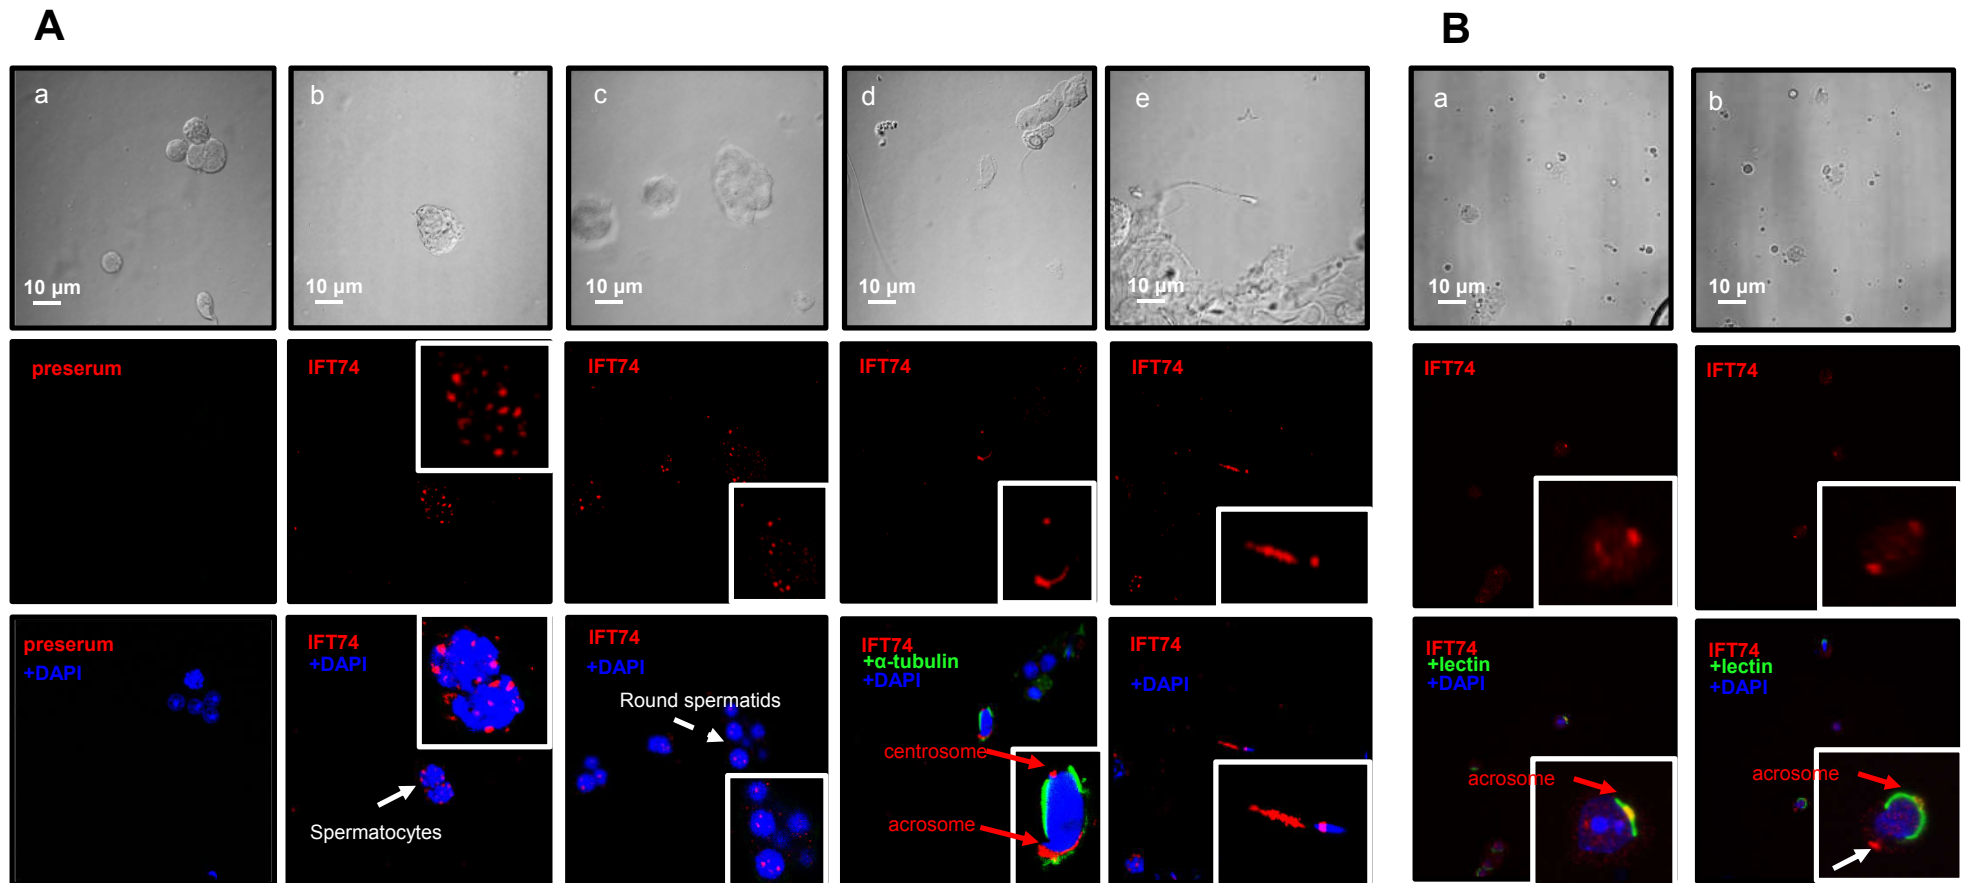



Figure 3

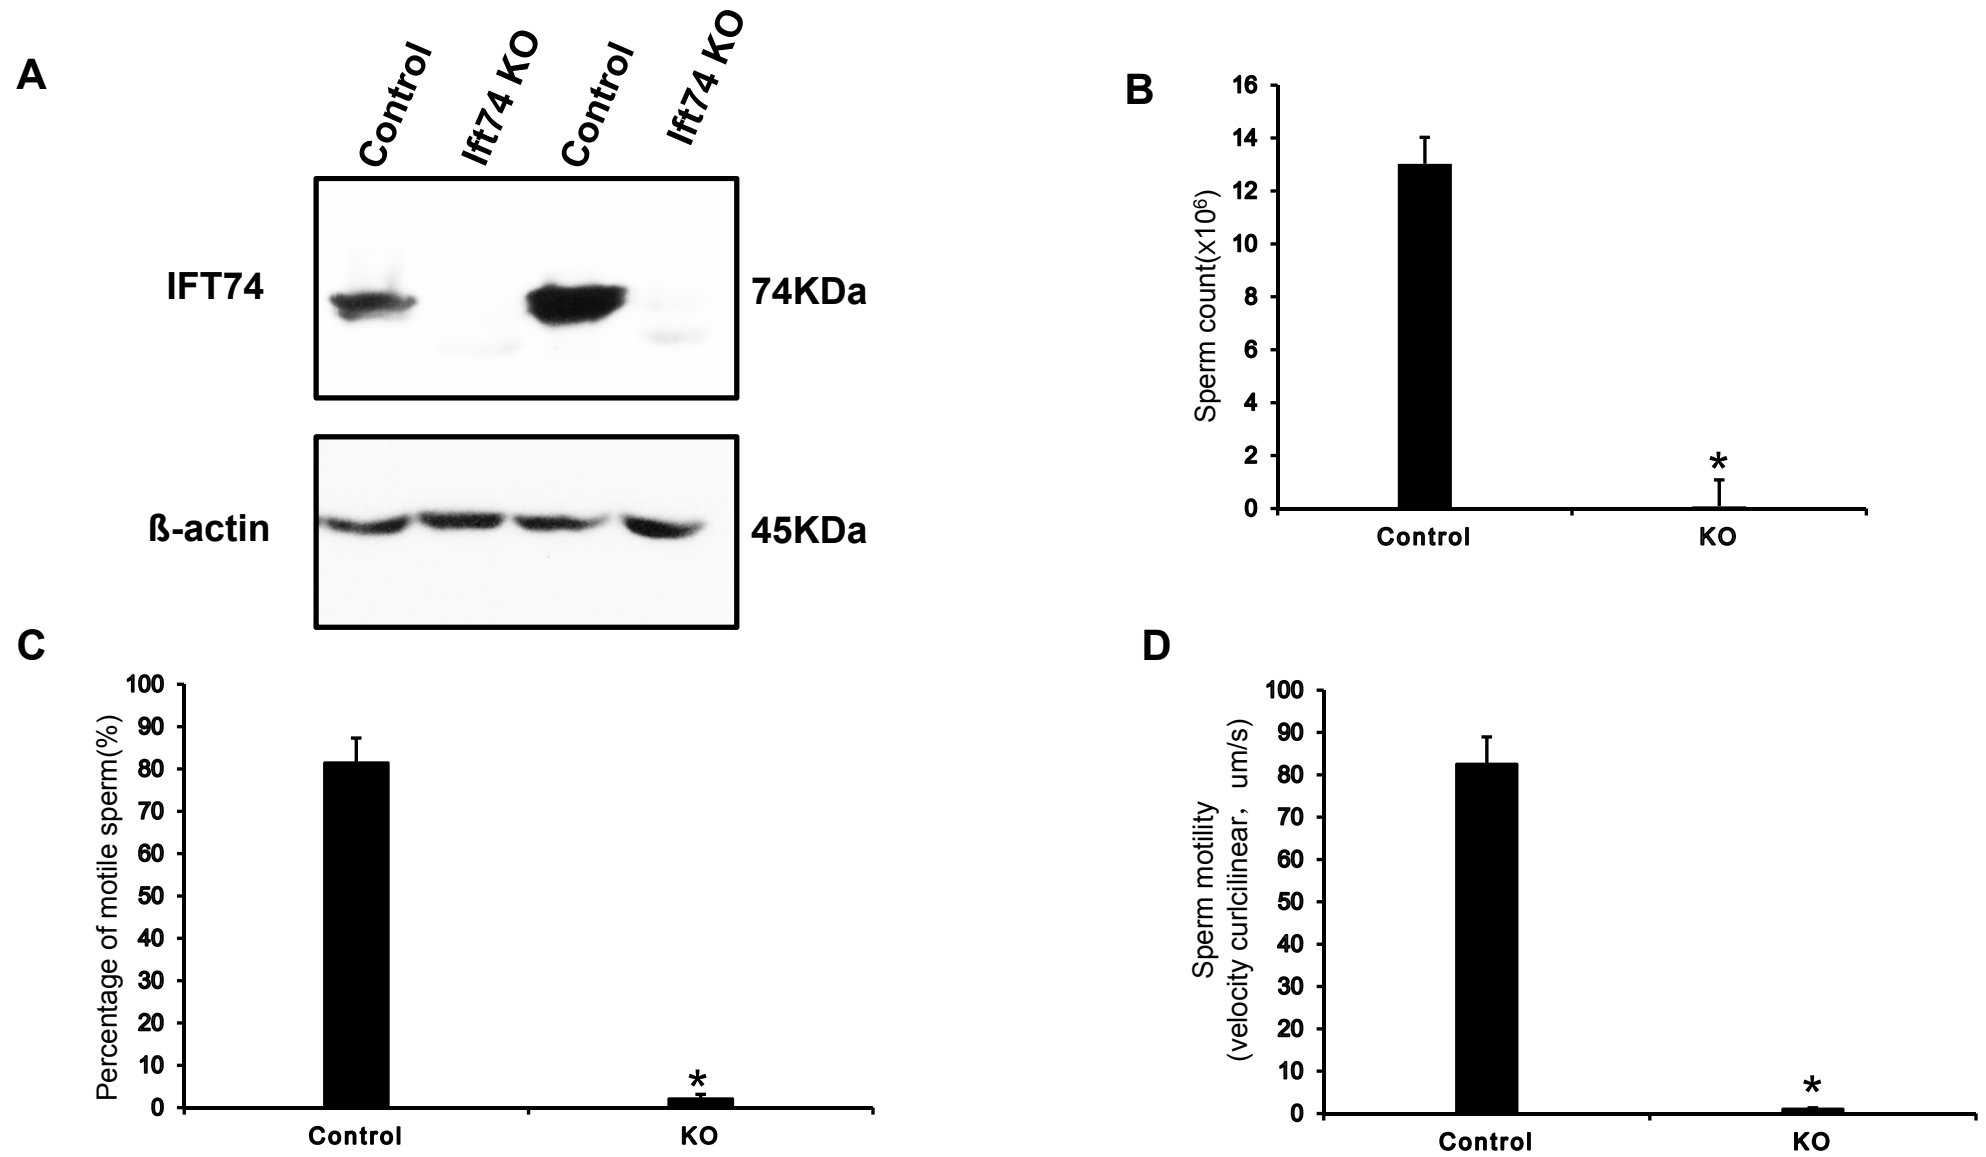

**Figure 4**

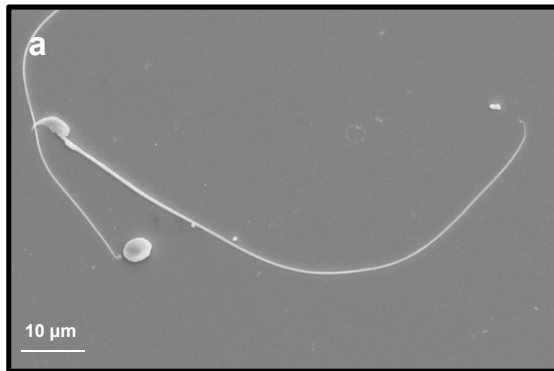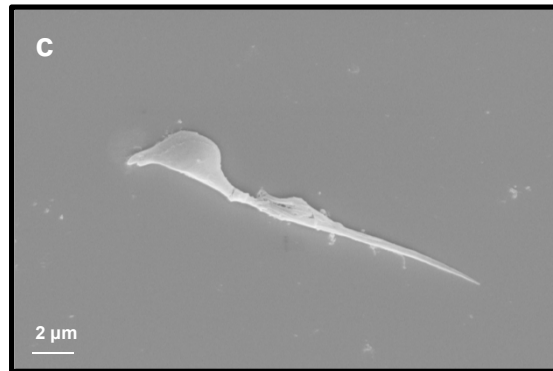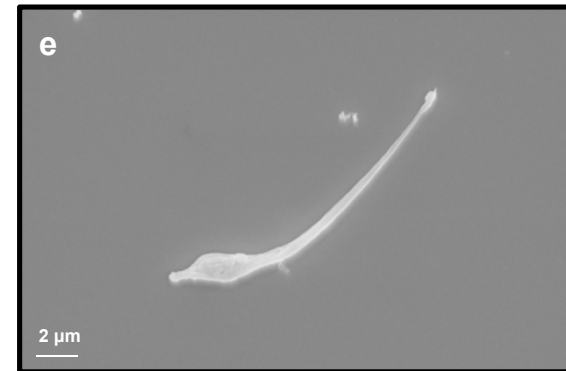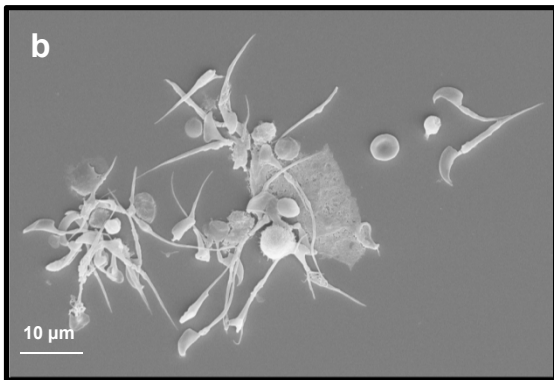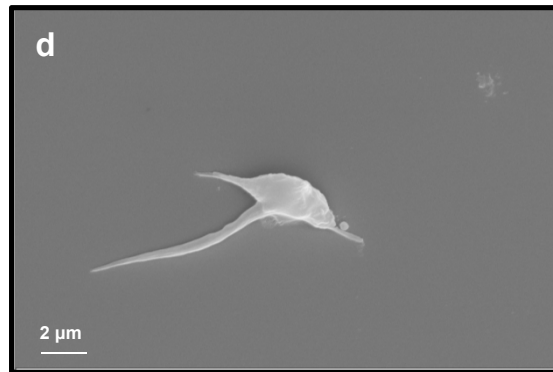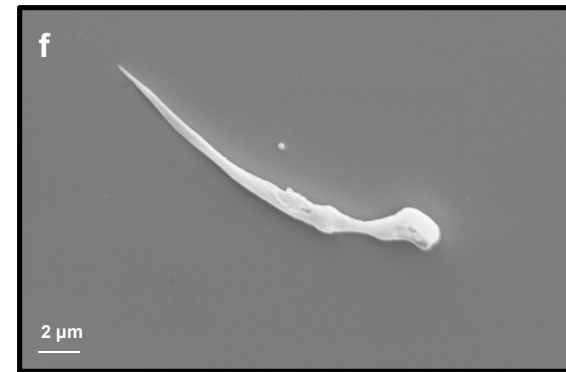

Figure 5

A

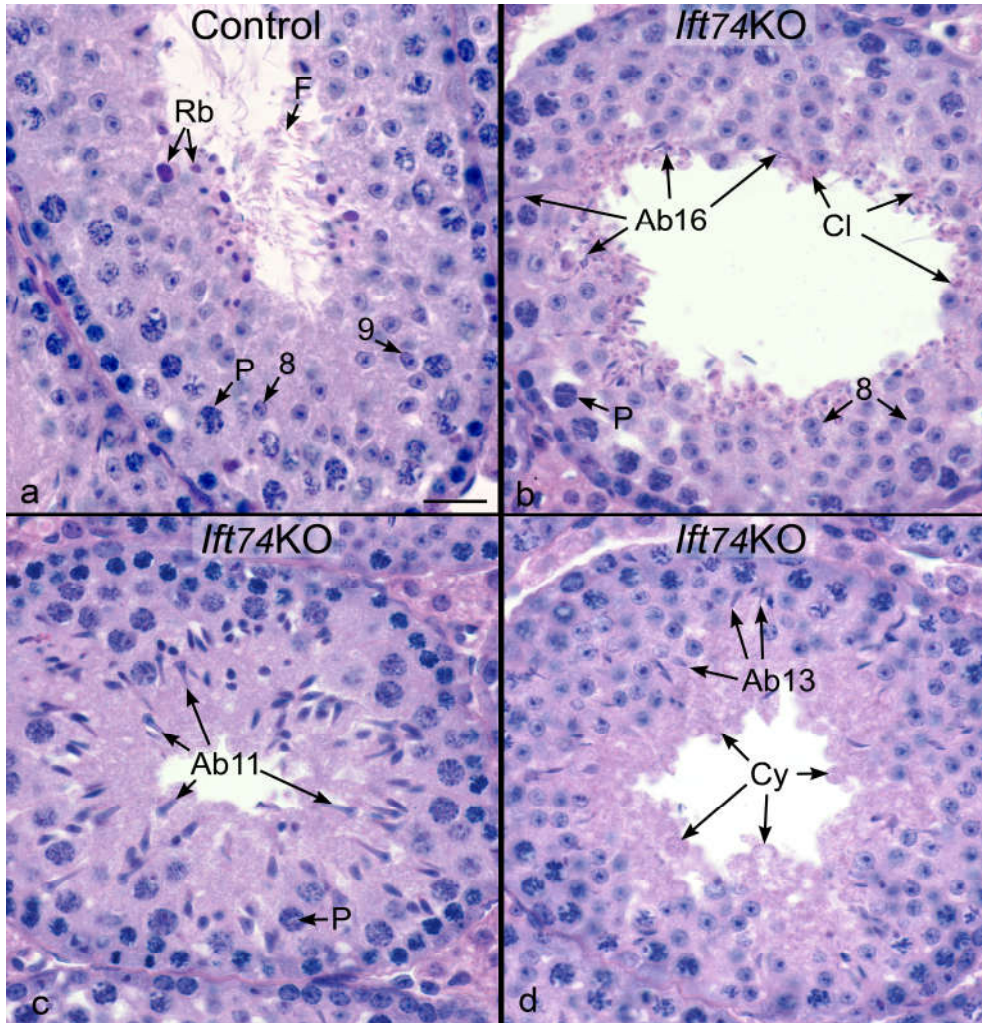

B

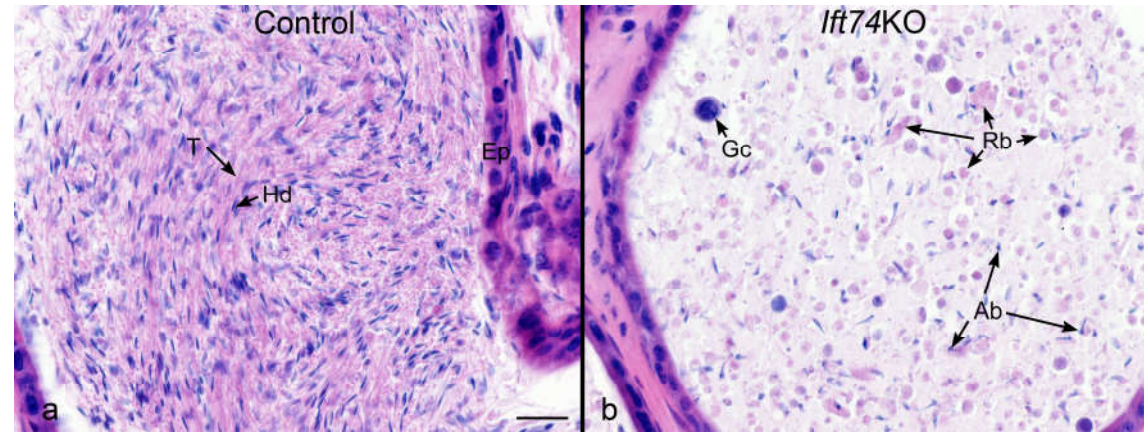

Figure 6

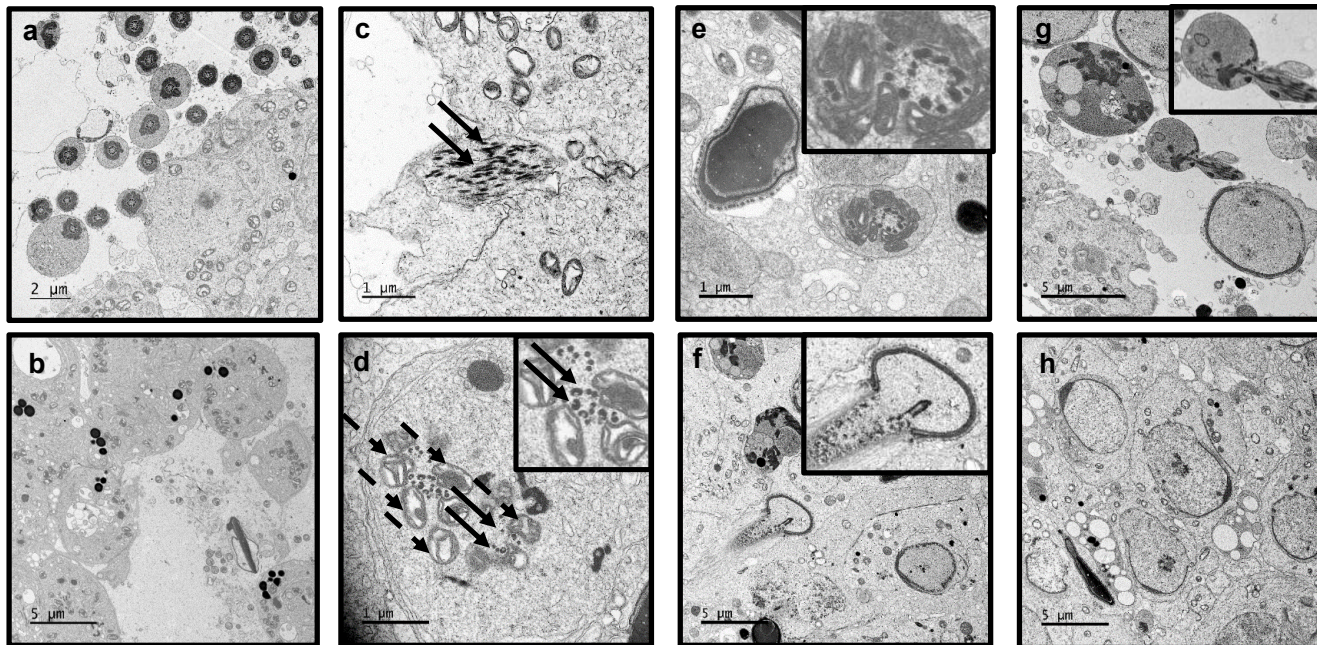

Figure.7A

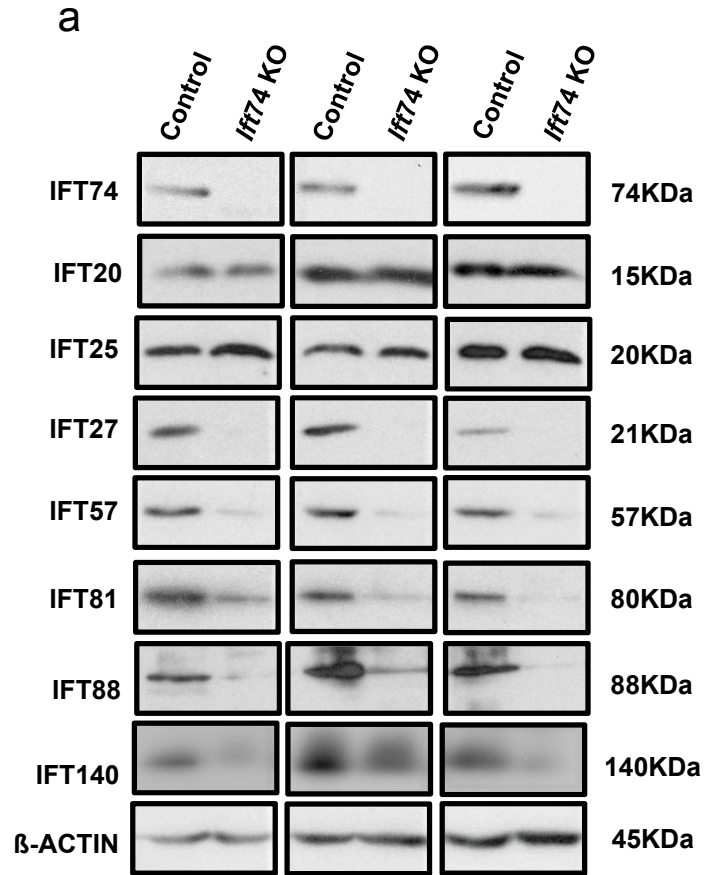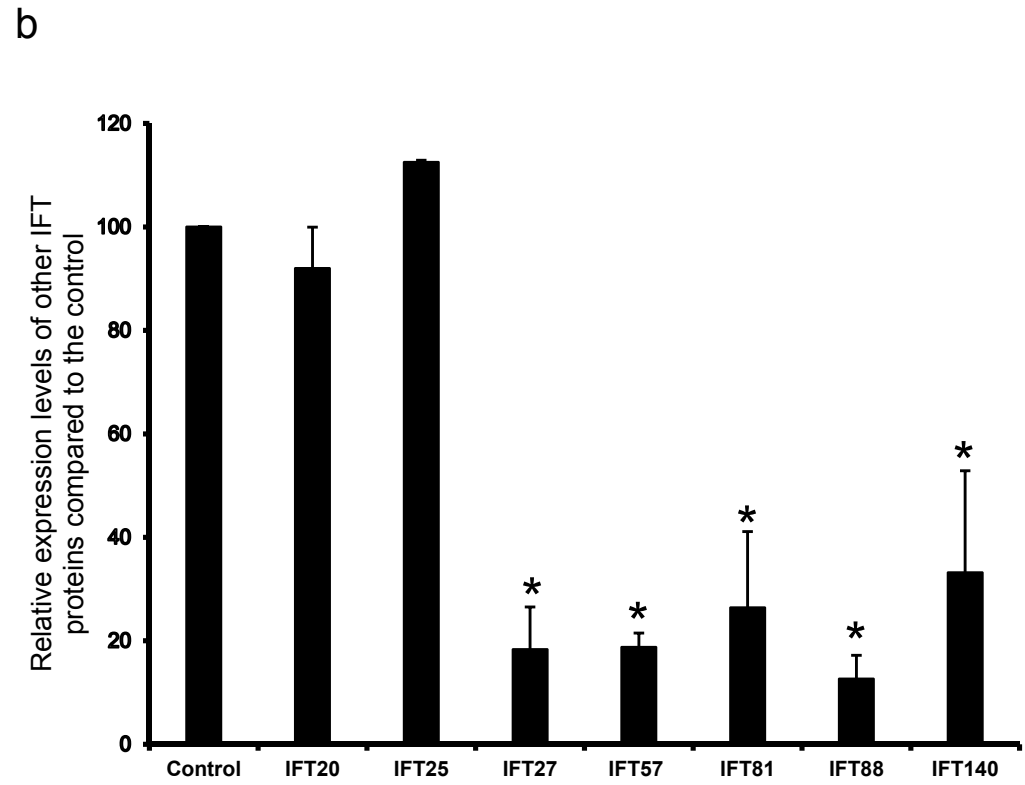

Figure. 7B

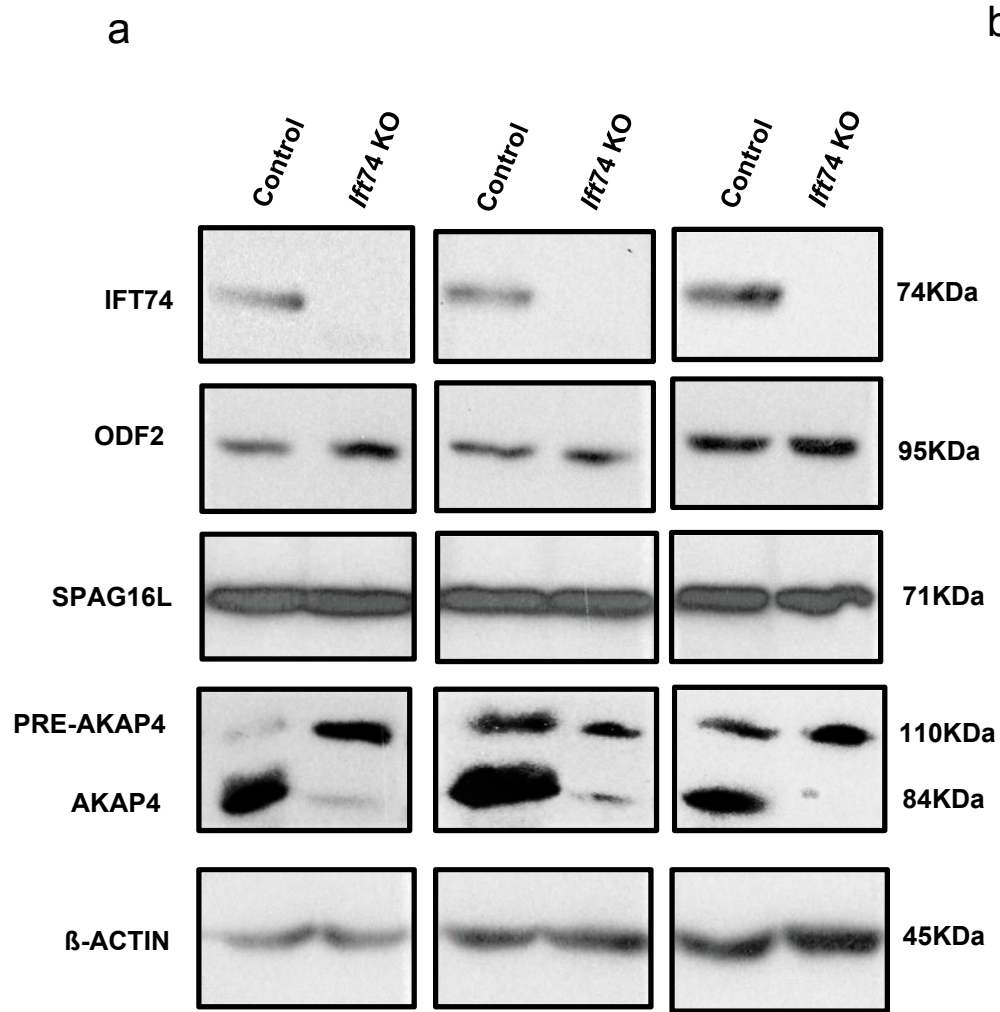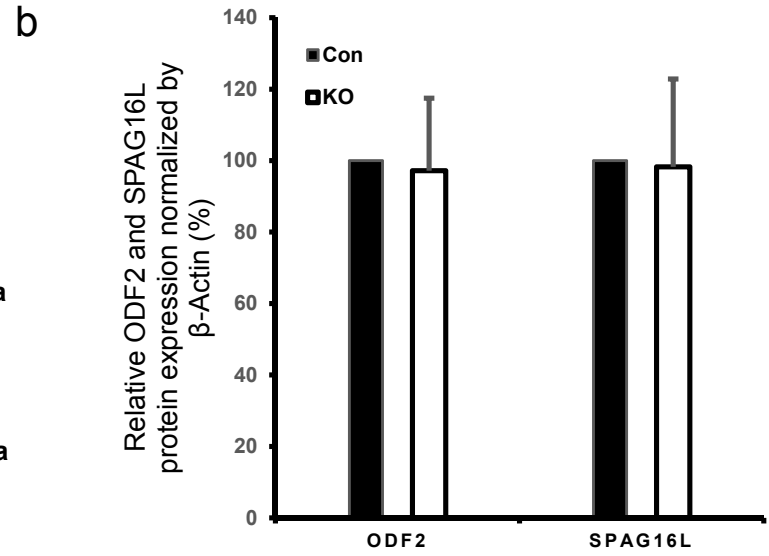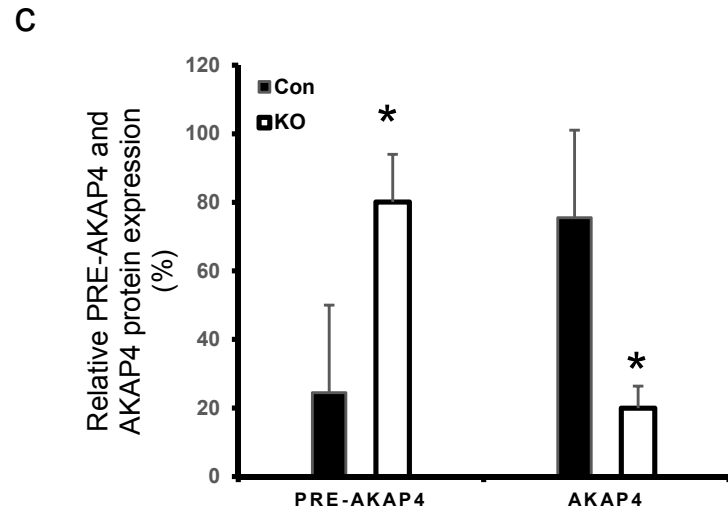

Source: https://biorxiv.org/content/biorxiv/early/2018/10/31/457804.full-text.pdf
